# Supplementary material for: Disentangling Scatter in Long-Term Concentration-Discharge Relationships: the Role of Event Types
Source: Copernicus journal article supplement (doi:10.5194/egusphere-2022-205), 2022-04-25
Supplement: Supplementary file 1 [file egusphere-2022-205-supplement.pdf]

# Disentangling Scatter in Long-Term Concentration-Discharge Relationships: the Role of Event Types

Felipe A. Saavedra<sup>1</sup>, Andreas Musolff<sup>2</sup>, Jana von Freyberg<sup>3,4</sup>, Ralf Merz<sup>1</sup>, Stefano Basso<sup>1</sup>, Larisa Tarasova<sup>1</sup>

<sup>1</sup>Department Catchment Hydrology, Helmholtz Centre for Environmental Research-UFZ, Halle (Saale), 06120 , Germany

<sup>2</sup>Department of Hydrogeology, Helmholtz Centre for Environmental Research-UFZ, Leipzig, 04318, Germany

<sup>3</sup>Department of Environmental Systems Science, ETH Zurich, 8092 Zurich, Switzerland

<sup>4</sup>Swiss Federal Institute for Forest, Snow and Landscape Research WSL, 8903 Birmensdorf, Switzerland

Correspondence to: Felipe A. Saavedra (felipe.saavedra@ufz.de)

## Supplementary Information

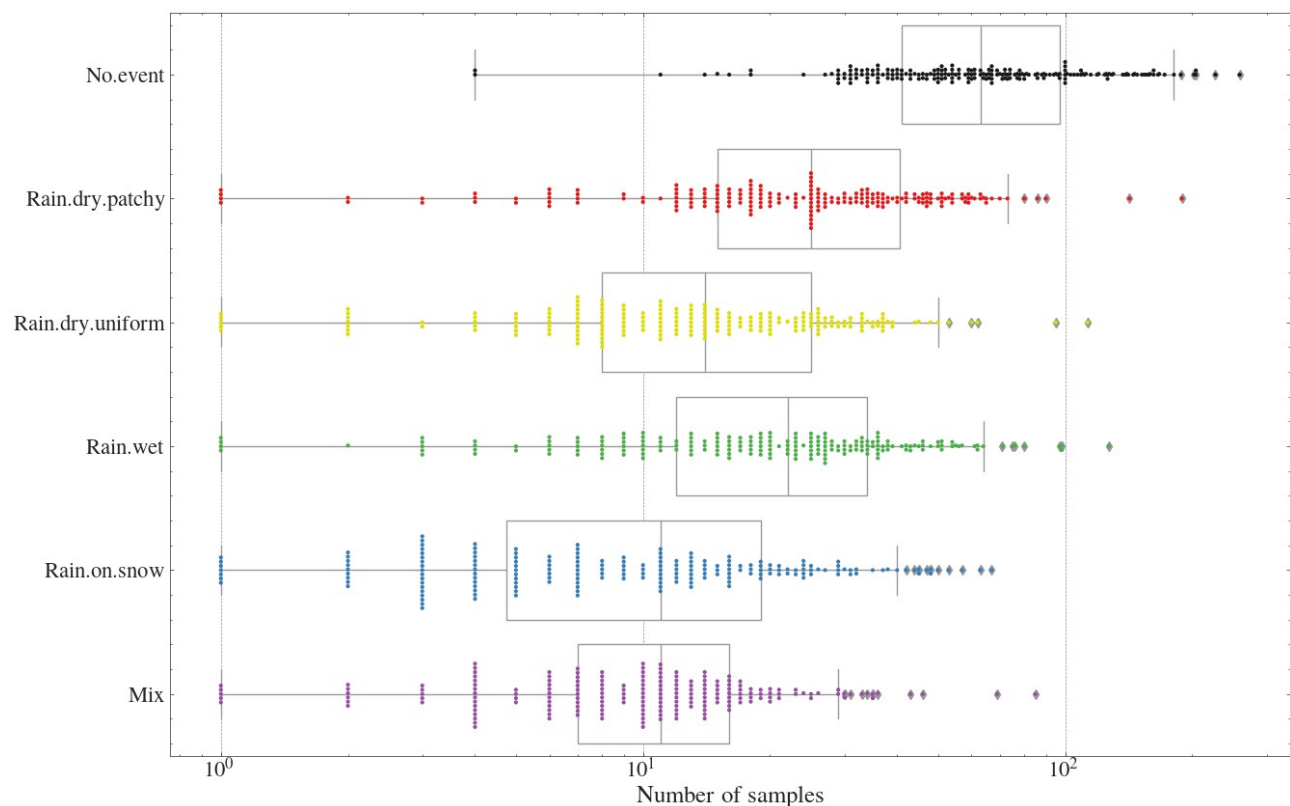

**Figure S1.** Number of samples in all 184 catchments attributed to each event type. Vertical lines show medians, 5<sup>th</sup> and 95<sup>th</sup> percentiles of boxplots.

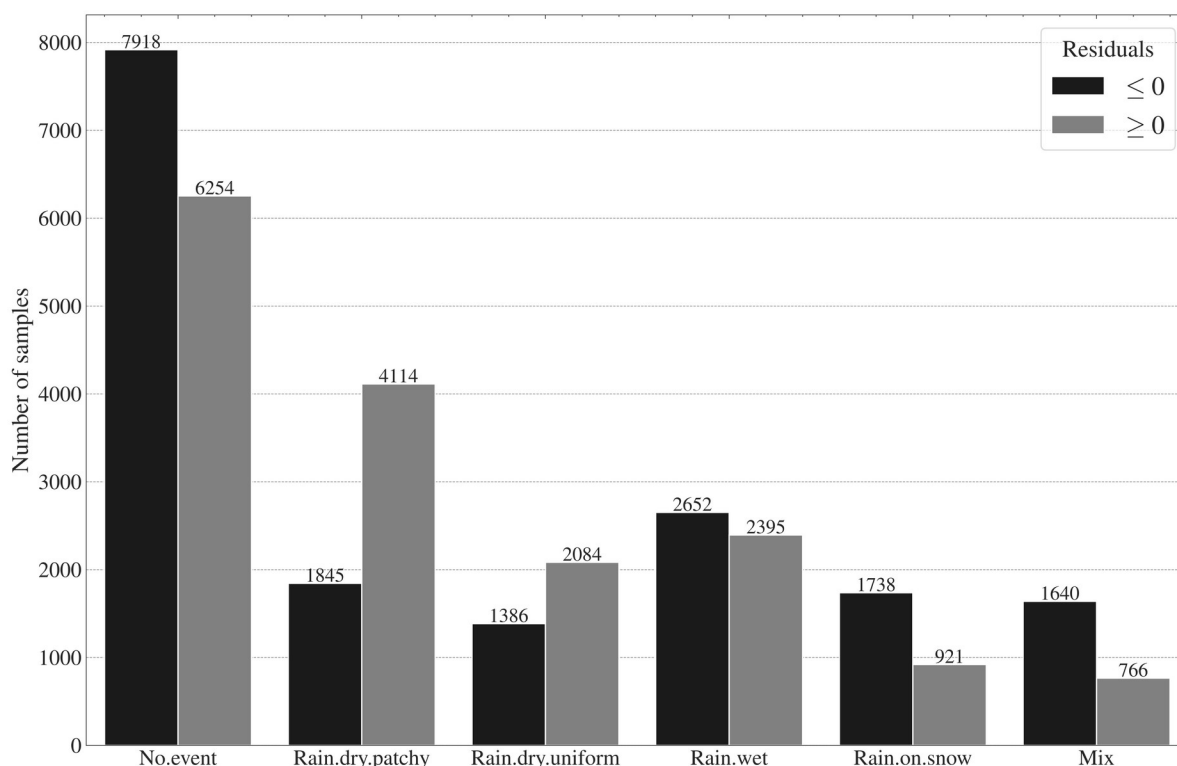

Figure S2: Number of nitrate samples from all catchments with positive and negative residuals for each event type.

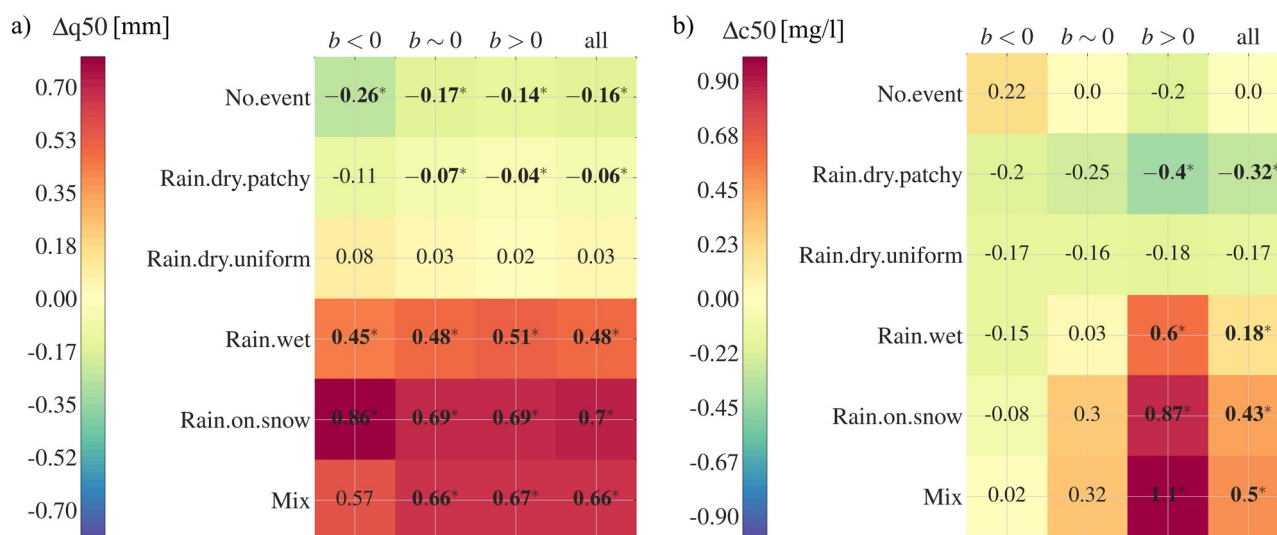

Figure S3. Heatmaps of differences between samples taken during different event types or No.event and all samples (analogous to Figure 5) for a) discharge and b) concentration of nitrate, averaged across different groups of catchments, considering all nitrate data for each event type and No.event. The three first columns of the heatmap correspond to one of the long-term export patterns (i.e., dilution (slope  $b < 0$ ), neutral (slope  $b \sim 0$ ) and enrichment (slope  $b > 0$ )) and the fourth column corresponds to all study catchments. Bold font and \* indicates significant differences (Kruskal-Wallis test,  $p < 0.05$ ).

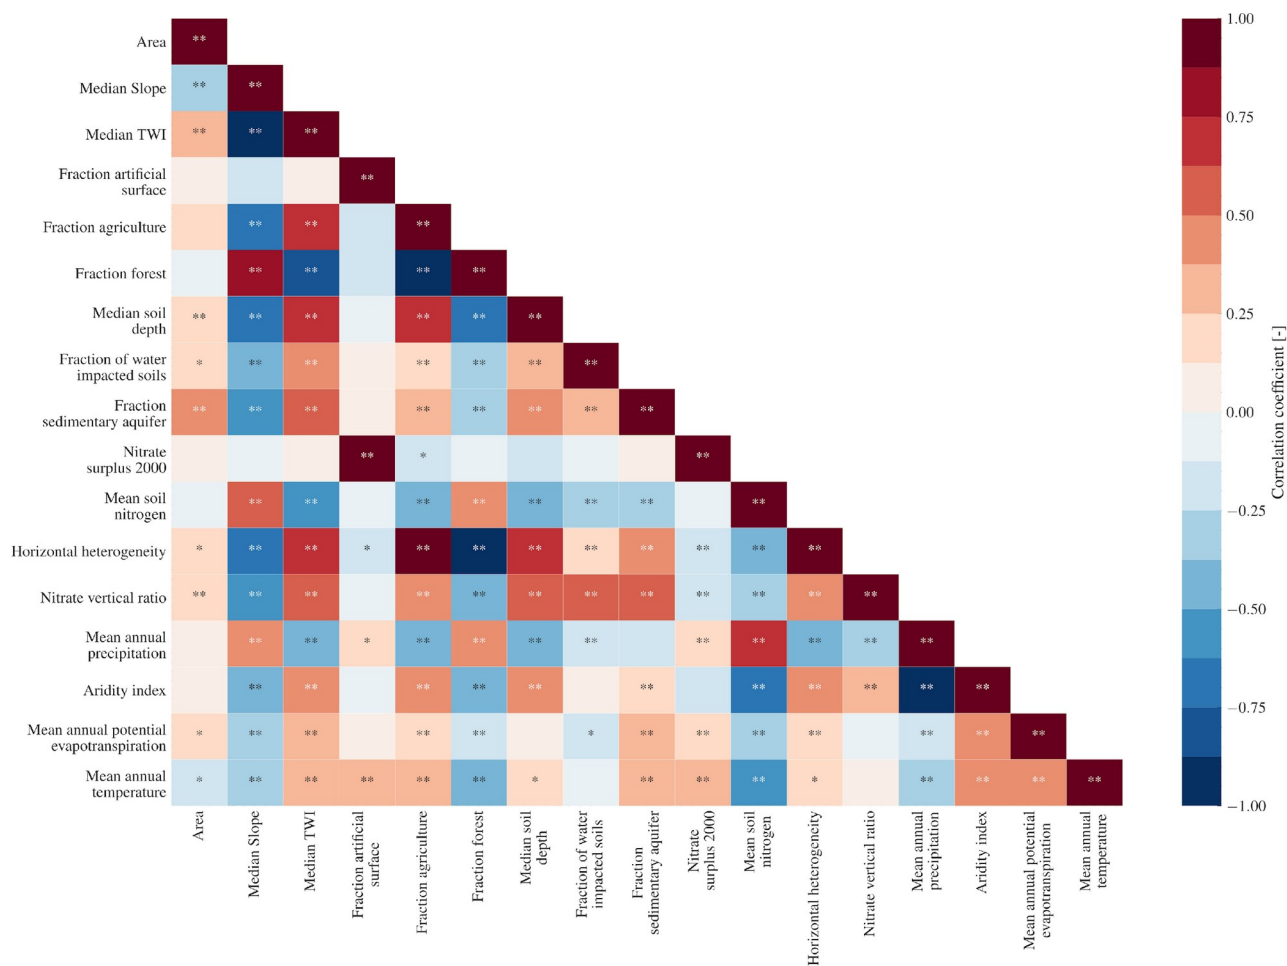

**Figure S4. Spearman rank correlation coefficient between catchment descriptors. Significant correlations are indicated as \* for  $p < 0.05$  and \*\* for  $p < 0.01$ .**

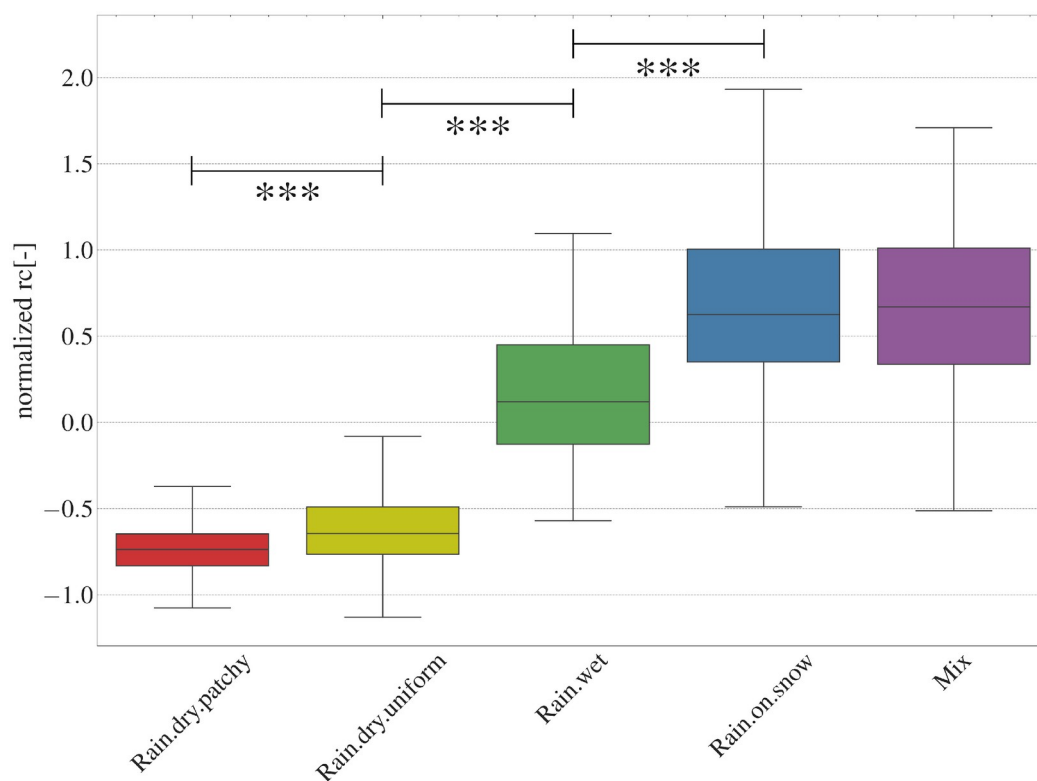

**Figure S5. Median normalized event runoff coefficients for each catchment and each event type. Normalization of nitrate samples was computed for each catchment subtracting the mean value and dividing by the standard deviation. Significant differences between medians of adjacent boxplots was estimated using Kruskal-Wallis test (displayed as \*\*\* for  $p < 0.001$ , \*\* for  $p < 0.01$  and \* for  $p < 0.05$ ).**

**Table S1: Thresholds and variables used for classification of runoff events (modified from Tarasova et al., 2020).**

| Layer                               | Selected indicator                                                      | Expression                                                          | Thresholds     | Performed Split                  |
|-------------------------------------|-------------------------------------------------------------------------|---------------------------------------------------------------------|----------------|----------------------------------|
| a) Inducing event                   | Ratio of event rainfall volume and total event precipitation volume     | $\frac{R_{x,y,t}}{P_{x,y,t}}$                                       | 0.95           | Rainfall vs. Mix or Rain.on.snow |
|                                     | Normalized spatial covariance of event-averaged snow cover and rainfall | $\frac{\text{cov}_{x,y}(SWE_t, R_t)}{SWE_{x,y,t} \times R_{x,y,t}}$ | 0              | Rain.on.snow vs. Mix             |
| b) Wetness state                    | Catchment-averaged antecedent soil moisture                             | $SM_{x,y}(t_0)$                                                     | $\max(\kappa)$ | Wet vs Dry                       |
| c) Spatial distribution of mositure | Spatial coefficient of variation of antecedent soil moisture            | $\frac{\sqrt{\text{var}_{x,y}(SM_{t_0})}}{SM_{x,y,t}}$              | $Q_2$          | Uniform vs Patchy                |

Note: Input data is grid-based, for each cell  $(x, y)$  and time step  $t$  during an event the following variables are provided: event rainfall rate  $R(x, y, t)$  [mm]; total event precipitation rate  $P(x, y, t)$  [mm/day] and snow water equivalent  $SWE(x, y, t)$  [mm]. At the beginning of each event ( $t_0$ ) antecedent soil moisture  $SM(x, y, t_0)$  [-] is provided.  $Q_2$  correspond to median value and  $\kappa$  is the curvature of a nonlinear function that describes the relation between event runoff coefficients and simulated soil moisture (Tarasova et al., 2018). Rainfall data was obtained from REGNIE data set (Rauthe et al., 2013). Snow water equivalent and soil moisture were simulated by the mHM model (Samaniego et al 2010; Kumar et al 2013) and provided in Zink et al. (2017).

**Table S2: Catchment descriptors used for correlation analysis. (according to Ebeling et al., 2021).**

| Category         | Variable                                 | Unit                                 | Description                                                                                                                                                          |
|------------------|------------------------------------------|--------------------------------------|----------------------------------------------------------------------------------------------------------------------------------------------------------------------|
| Topography       | Area                                     | km <sup>2</sup>                      | Catchment area                                                                                                                                                       |
|                  | Median Slope                             | °                                    | Mean topographic slope of catchment                                                                                                                                  |
|                  | Median TWI                               | -                                    | Mean topographic wetness index                                                                                                                                       |
| Land Cover       | Fraction of agriculture                  | -                                    | Fraction of agricultural land cover                                                                                                                                  |
|                  | Fraction of forest                       | -                                    | Fraction of forested land cover                                                                                                                                      |
| Soil & Aquifer   | Median soil depth                        | cm                                   | Median depth to bedrock in the catchment                                                                                                                             |
|                  | Fraction of sedimentary aquifer          | -                                    | Fraction of sedimentary aquifer                                                                                                                                      |
| Nutrient source  | Nitrate surplus 2000                     | kgN ha <sup>-1</sup> y <sup>-1</sup> | Mean nitrogen surplus per catchment during sampling period (2000–2015) including N surplus on agricultural land and atmospheric deposition on non-agricultural areas |
|                  | Horizontal heterogeneity                 | -                                    | Slope of relative frequency of source areas in classes of flow distances to stream as a proxy for horizontal source heterogeneity                                    |
|                  | Nitrate vertical ratio                   | -                                    | Mean ratio between potential seepage and groundwater NO3-N concentrations as proxy for vertical concentration heterogeneity                                          |
| Hydrometeorology | Mean annual precipitation                | mm y <sup>-1</sup>                   | Mean annual precipitation for the period 1986–2015                                                                                                                   |
|                  | Mean annual potential evapotranspiration | mm y <sup>-1</sup>                   | Mean annual potential evapotranspiration for the period 1986–2015                                                                                                    |
|                  | Aridity index                            | -                                    | Fraction of mean annual potential evapotranspiration and mean annual precipitation                                                                                   |
|                  | Mean annual temperature                  | ° C                                  | Mean annual air temperature for the period 1986–2015                                                                                                                 |
